# Supplementary material for: Boosting the electrocatalytic activity of LaCoO3 core–shell hollow spheres for oxygen evolution reaction through modulating inner oxygen vacancies
Source: Royal Society of Chemistry journal article supplement (doi:10.1039/d4re00539b), 2024-12-26
Supplement: d4re00539b1.pdf [file d4re00539b1.pdf]

## **Electronic Supplementary Information**

**Boosting the electrocatalytic activity of LaCoO<sub>3</sub> core–shell hollow sphere for oxygen evolution reaction through modulating inner oxygen vacancies**

**Long Li, Jinbo Guo, Jiang Shen and Qiang Hu\***

Department of Chemistry, Lishui University, Lishui 323000, P. R. China.

E-mail: [qihu@z-etechnology.com](mailto:qihu@z-etechnology.com)

## 1 Materials characterizations

The phase formation was identified using powder X-ray diffraction (XRD) (Bruker D8, Cu-K $\alpha$ ). The morphologies of the catalysts were observed by field emission scanning electron microscopy (FE-SEM, HITACHI S-4800) and transmission electron microscopy (TEM, JEOL JEM-2010). The linear scanning energy-dispersive X-ray spectrometry (EDX) and EDX elemental mappings were taken on TEM. The X-ray photoelectron spectroscopy (XPS) spectra were measured on ESCALAB 250 spectrometer (Perkin-Elmer). Electron paramagnetic resonance (EPR) spectra were performed using a Bruker ESR spectrometer (JES-FA200).

## 2 Electrochemical measurements

The electrochemical tests were conducted on CHI 760E electrochemical workstation. The Ag/AgCl (saturated KCl solution) as used as the reference electrode, a graphite rod was served as the counter electrode, and all NiO spheres catalysts were utilized as working electrode. All electrochemical tests were performed in 1 M KOH aqueous electrolyte and the catalysts were dissolved in ethanol solution and then uniformly cast onto glassy carbon working electrode with a total loading of 0.4 mg cm<sup>-2</sup>. All the linear sweep voltammetry (LSV) measurements were taken at a scan rate of 5 mV s<sup>-1</sup> to obtain the polarization curves. Chronoamperometric measurements were performed at corresponding potential to deliver a current density of 10 mA cm<sup>-2</sup>. The Tafel slope was calculated according to the Tafel equation  $\eta = b \log (j/j_0)$  ( $\eta$  is the overpotential,  $b$  is the Tafel slope,  $j$  is the current density, and  $j_0$  is the exchange current density). Potentials were referenced to a reversible hydrogen electrode (RHE) using the following equation: Potentials were referenced to a reversible hydrogen electrode (RHE) using the following equation:  $E \text{ (RHE)} = E \text{ (Ag/AgCl)} + (0.205 + 0.059\text{pH}) \text{ V}$ . The electrochemical impedance spectroscopy (EIS) measurements were carried out by ranging the frequency from 100 k Hz to 0.1 Hz.

## 2. Supplementary figures

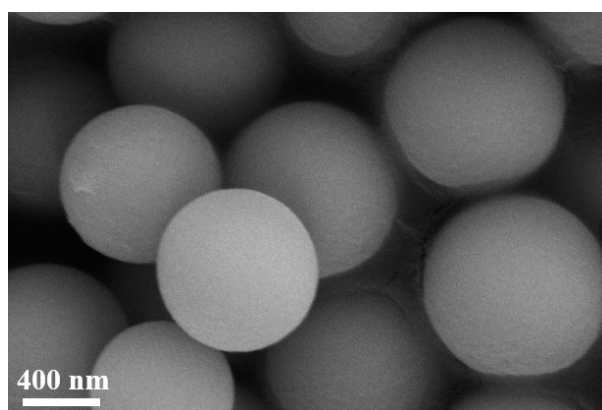

**Fig. S1** SEM image of the LaCo-precursor sample.

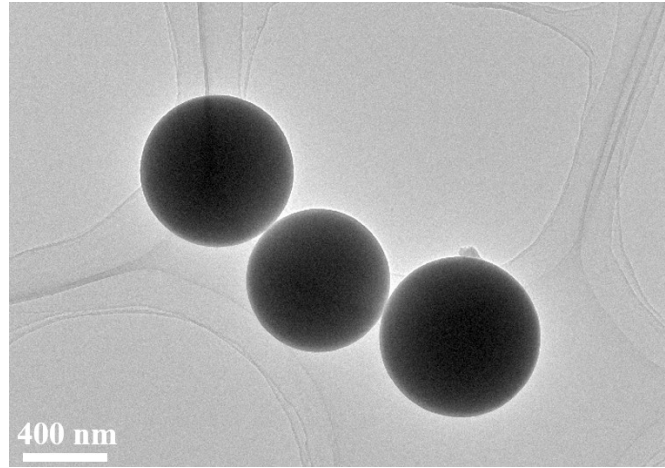

**Fig. S2** TEM image of the LaCo-precursor sample.

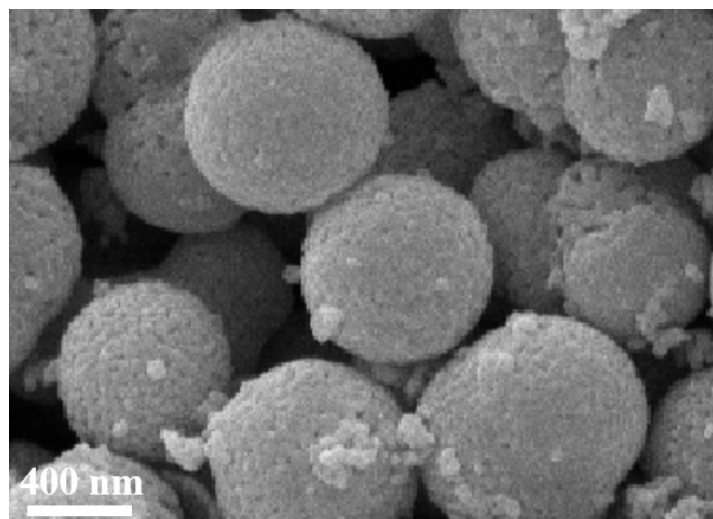

**Fig. S3** SEM image of the  $\text{LaCoO}_3$  core-shell hollow spheres.

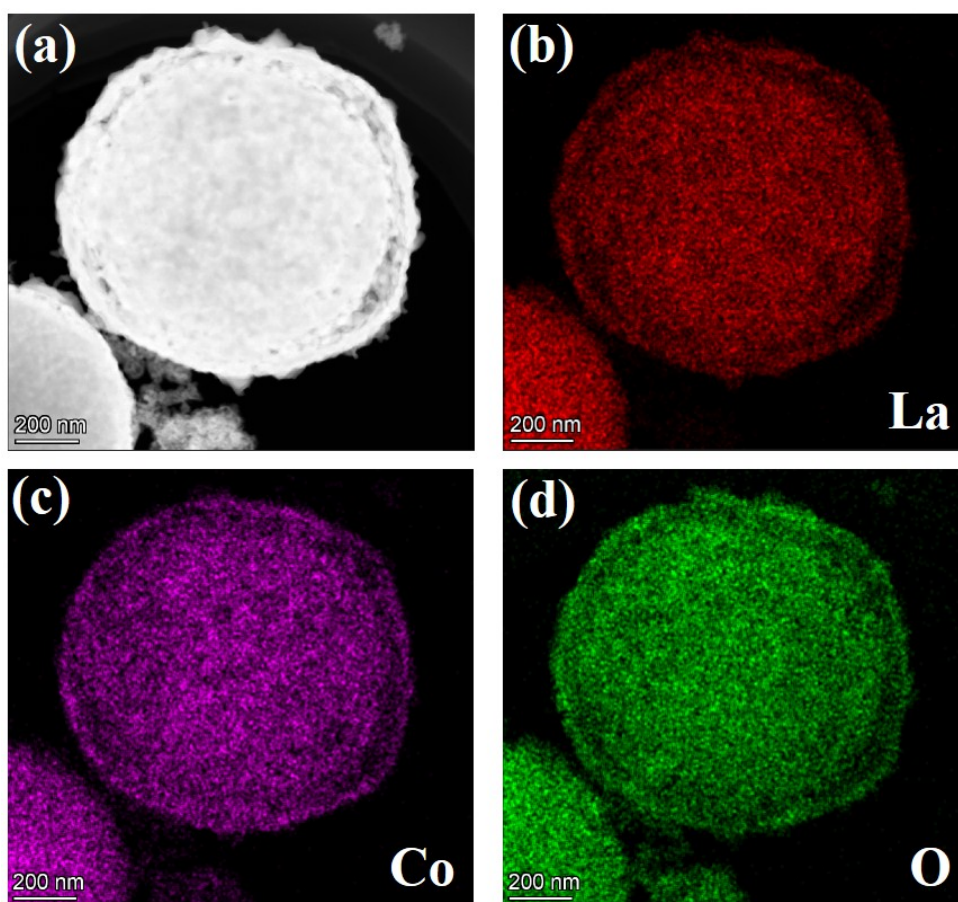

**Fig. S4** (a) High resolution TEM image, (b) La mapping, (c) Co mapping and (d) O mapping of an individual  $\text{LaCoO}_{3-x}\text{-M}$  core-shell sphere.

One  $\text{LaCoO}_{3-x}\text{-M}$  core-shell sphere has been randomly picked and the core-shell morphology was examined by high resolution TEM (HR-TEM, Fig. S4a). The elemental mapping is carried out, and the La, Co, and O elements are clearly identified as shown in Fig. S4b-d.

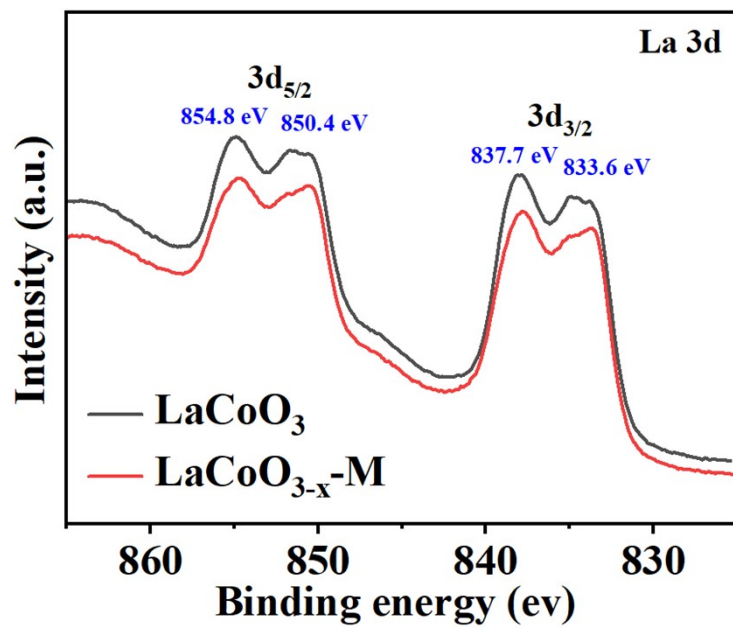

**Fig. S5** High-resolution XPS spectrum of La 3d for LaCoO<sub>3</sub> and LaCoO<sub>3-x</sub>-M spheres.

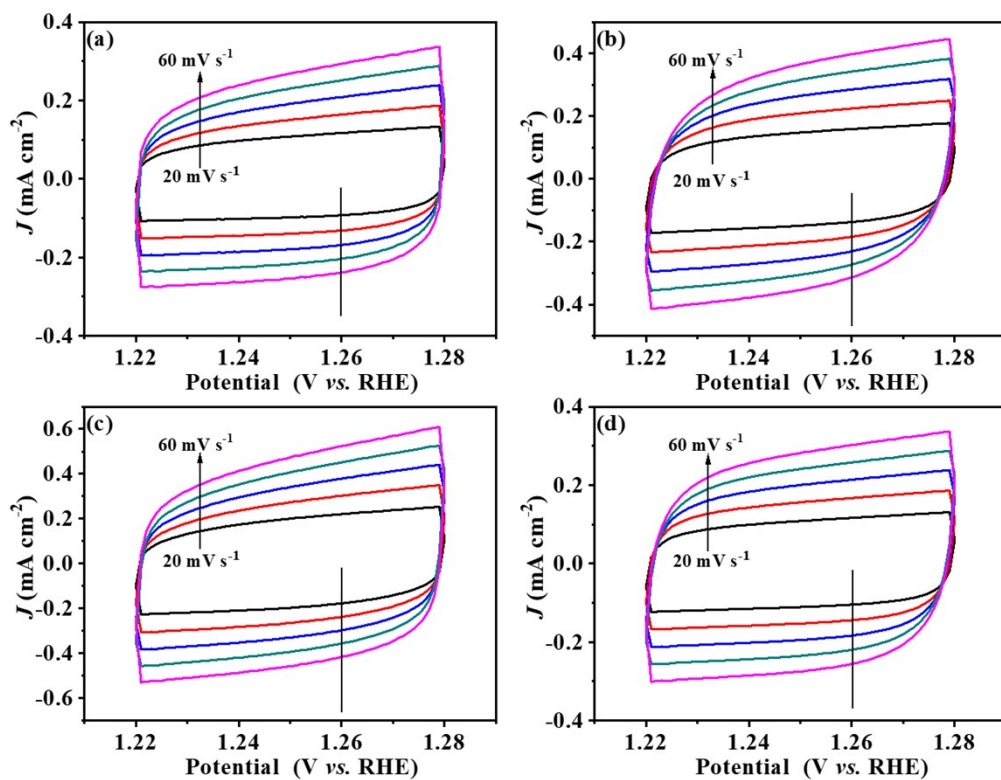

**Fig. S6** CVs tested at the potential range of 1.22 –1.28 V vs. RHE with the scan rates increasing from 20 to 60 mV s<sup>-1</sup> for (a) LaCoO<sub>3</sub>, (b) LaCoO<sub>3-x</sub>-L, (c) LaCoO<sub>3-x</sub>-M and (d) LaCoO<sub>3-x</sub>-H spheres.



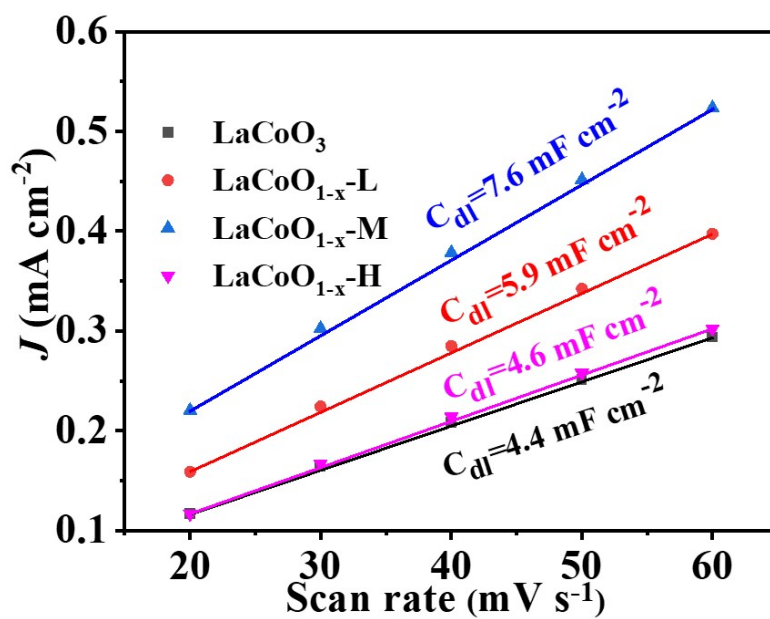

**Fig. S7** Plots of the current density at 1.26 V (vs. RHE) vs. the scan rate of LaCoO<sub>3</sub>, LaCoO<sub>3-x</sub>-L, LaCoO<sub>3-x</sub>-M and LaCoO<sub>3-x</sub>-H spheres.

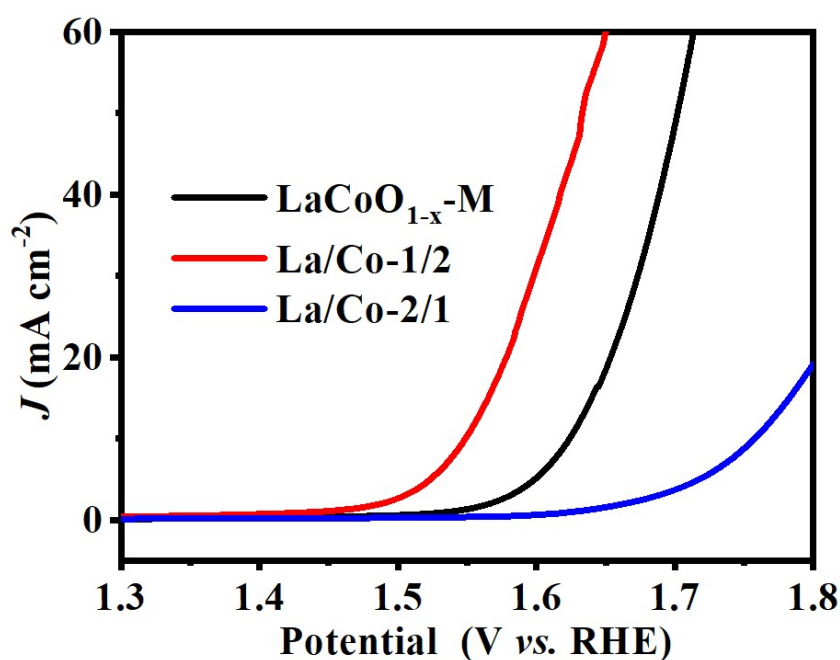

**Fig. S8** Polarization curves of  $\text{LaCoO}_{3-x}\text{-M}$ ,  $\text{La/Co-1/2}$  and  $\text{La/Co-2/1}$  spheres in an  $\text{O}_2$ -saturated 1.0 M KOH solution (scan rate of  $2 \text{ mV s}^{-1}$ ).

The electrocatalytic performance with different La and Co in the  $\text{LaCoO}_{3-x}$  core-shell spheres was further evaluated via the linear sweep voltammetry. As shown in Fig. S8, when the ratio of La to Co is 1 to 2, the  $\text{La/Co-1/2}$  spheres exhibited a higher catalytic activity than the  $\text{LaCoO}_{3-x}\text{-M}$  spheres. In addition to  $\text{LaCoO}_3$ , cobalt oxide may be produced as a product when the ratio of La to Co is 1 to 2. And the higher catalytic activity may originate from cobalt oxide, which usually has better catalytic performance compared to  $\text{LaCoO}_3$ . Further when the ratio of La to Co is 2 to 1, the  $\text{La/Co-2/1}$  spheres exhibited a lower catalytic activity than the  $\text{LaCoO}_{3-x}\text{-M}$  spheres. In addition to  $\text{LaCoO}_3$ , lanthanum oxide may be produced as a product when the ratio of La to Co is 2 to 1. The presence of lanthanum oxide may lead to a decrease in catalytic activity. Considering that more cobalt in the  $\text{LaCoO}_{3-x}$  core-shell spheres leads to better catalytic activity, cobalt should be the active center. This can be confirmed by the XPS spectrum of the  $\text{LaCoO}_{3-x}\text{-M}$  spheres before and after electrolysis. As shown in Fig. S9a, the ratio of  $\text{Co}^{3+}$  in  $\text{LaCoO}_{3-x}\text{-M}$  spheres increased after electrolysis, demonstrating that higher valence cobalt species are produced after catalysis (such as  $\text{CoOOH}$ ).<sup>1, 2</sup> And the appearance of the O4 peak (M-OH) in XPS spectrum of O 1s (Fig. S9b) for the  $\text{LaCoO}_{3-x}\text{-M}$  spheres after catalysis further proves the production of  $\text{CoOOH}$  after catalysis.<sup>3, 4</sup> Furthermore, the almost unchanged La 3d XPS spectrum of the  $\text{LaCoO}_{3-x}\text{-M}$  spheres before and after electrolysis (Fig. S9c) further proves that cobalt should be the active center rather than lanthanum.

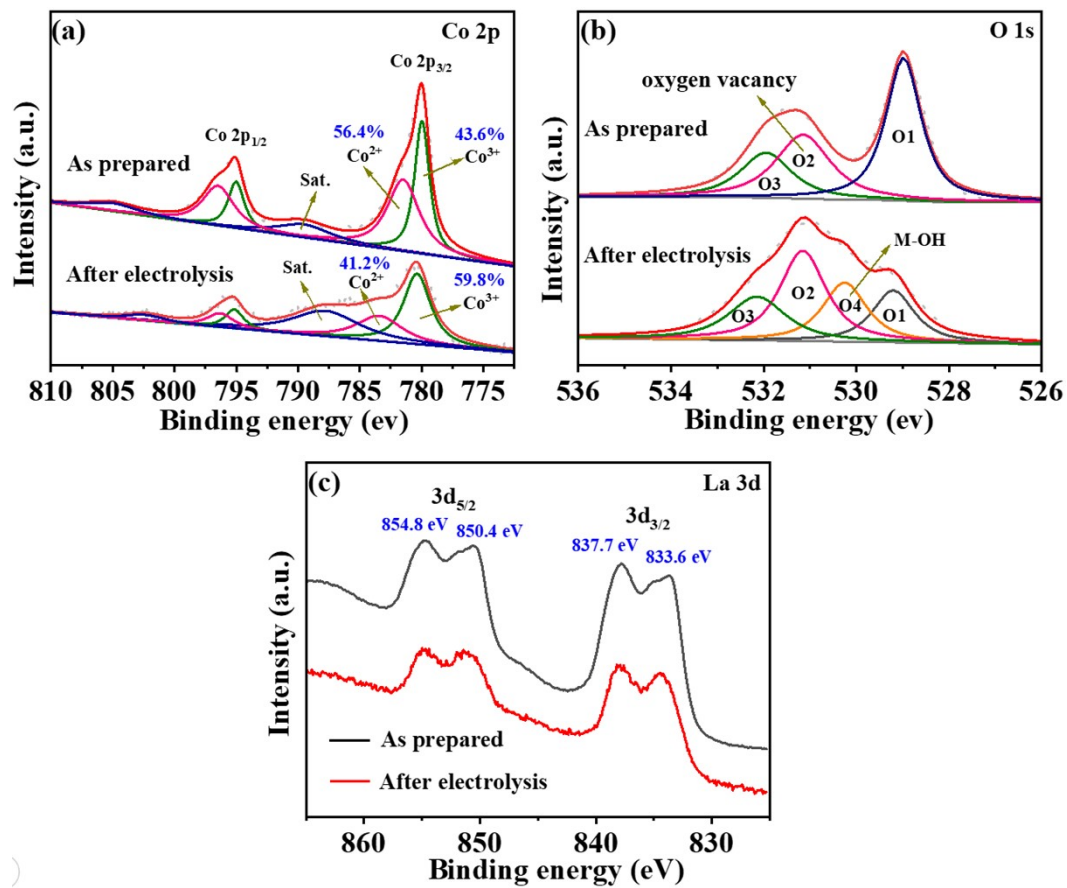

**Fig. S9** High-resolution XPS spectrum of (a) Co 2p, (b) O 1s, (c) La 3d for the LaCoO<sub>3-x</sub>-M spheres before and after electrolysis.

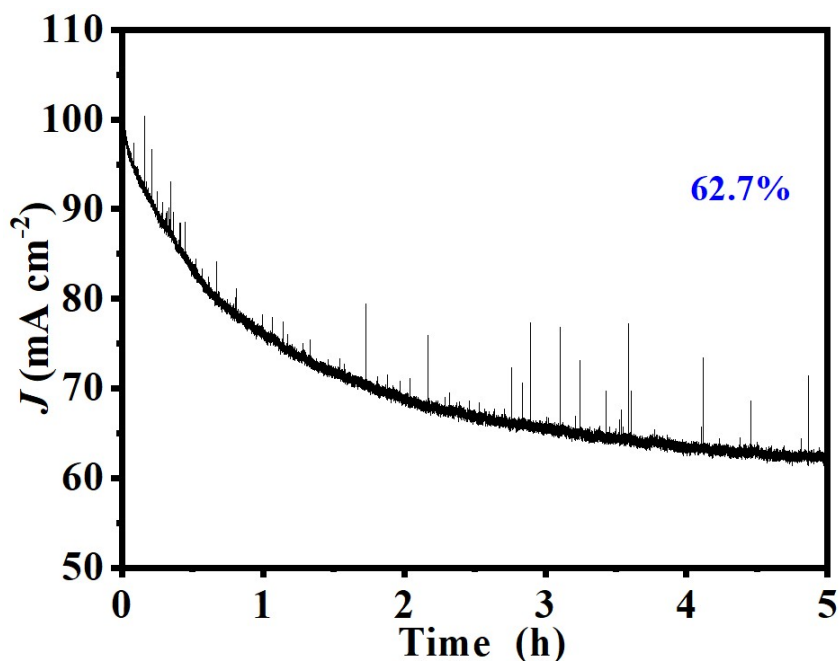

**Fig. S10** Chronoamperometric response at a current density of  $100 \text{ mA cm}^{-2}$  for 5 hours for  $\text{LaCoO}_{3-x}\text{-M}$  spheres.

The stability test at higher current density of  $100 \text{ mA cm}^{-2}$  was performed. As shown in Fig.S10,  $\text{LaCoO}_{3-x}\text{-M}$  spheres demonstrated huge drop in current density after 5 hours of continuous operation, and the unsatisfactory performance may come from the fact that the larger current density leads to the production of a large number of bubbles, resulting in severe catalyst shedding.

1. K. Zhu, X. Zhu and W. Yang, *Angew. Chem. Int. Ed.*, 2019, **58**, 1252-1265.
2. X. Zhang, S. Liu, Y. Zang, R. Liu, G. Liu, G. Wang, Y. Zhang, H. Zhang and H. Zhao, *Nano Energy*, 2016, **30**, 93-102.
3. L. Liardet and X. Hu, *ACS Cataly.*, 2019, **9**, 5522-5522.
4. H. Ali-Löyty, M. W. Louie, M. R. Singh, L. Li, H. G. Sanchez Casalongue, H. Ogasawara, E. J. Crumlin, Z. Liu, A. T. Bell, A. Nilsson and D. Friebe, *The Journal of Physical Chemistry C*, 2016, **120**, 2247-2253.
